# Supplementary material
Source: PubMed Central journal article supplement (PMC2805777)

## Supplementary data:

**Table S1.** Oligonucleotides used for amplifying *M. sexta* Spätzle-1 DNA.

**Table S2.** Oligonucleotides used in real-time PCR.

**Table S3.** Mass spectrometry identification of plasma proteins induced after Spätzle-C108 injection.

**Fig. S1.** Sequence of the region of the *M. sexta* proSpätzle gene encompassing the open reading frame. Deduced amino acid sequence encoded by exons is shown below the DNA sequence. The one-letter code for each amino acid residue is aligned with the second nucleotide of the corresponding codon. The 5' and 3' boundary of each intron is indicated in **bold**. The alternative 3' splicing sites resulting in variants proSpätzle-1A and proSpätzle-1B are shown in *italic*. Numbers left of the alignment indicate amino acid position with respect to the mature proSpätzle after the signal peptide in Fig.1.

**Fig. S2.** Alignment of amino acid sequences of insect Spätzle cystine knot domains. Sequences were aligned using the program Clustal W. The amino and carboxyl ends, which were highly variable, were left not included in the analysis. Asterisks (\*) below the alignment indicate identical residues at that position while colons (:) indicate conservative substitutions. Accession numbers for the sequences are as follows: Aa\_Spz1A, XM\_001663577; Aa\_Spz2, XM\_001659134; Aa\_Spz3, XM\_001653272; Aa\_Spz4, EF173379; Aa\_Spz5, XM\_001654288; Aa\_Spz6, XM\_001655868; Ag\_Spz2, XM\_557166; Ag\_Spz3, XM\_317093; Ag\_Spz4, XM\_317626; Ag\_Spz5, XM\_308593; Ag\_Spz6, XM\_314007; Bm\_Spz1, NM\_001114594; Dm\_Spz1A, NM\_079802; Dm\_Spz2, NM\_168090; Dm\_Spz3, NM\_135316; Dm\_Spz4, NM\_135660; Dm\_Spz5, NM\_139496; Dm\_Spz6, NM\_138117; Ms\_Spz1A, GQ249944; NV\_XP001606369, XP\_001606369; NV\_XP001607462, XP\_001607462; NV\_XP001605307, XP\_001605307; NV\_XP001599503, XP\_001599503; Tc\_GLEAN010504, GLEAN010504 from the Human Genome Sequencing Center at Baylor College of Medicine; Tc\_GLEAN05940, NM\_001160153; Tc\_GLEAN06726, XM\_0018106514; Tc\_GLEAN13304, XM\_965700; Tc\_GLEAN16368\_XM\_961942.

**Fig. S3** Analysis of the relative abundance of two *M. sexta* spätzle isoforms. (A) RT-PCR was used to amplify two isoforms using hemocyte cDNA from day 2 fifth instar larvae collected 24 hours after injection with curdlan. The positions of the two isoforms are indicated on the right. The lane numbers indicate samples obtained from three different insects. (B) The net intensities (the sum of the pixel values minus background) of each band corresponding to two isoforms in (A) were determined using Kodak Digital Science™ 1D Image Analysis Software 2.0. The bars represent mean  $\pm$  S.D. (n=3).



Table S2 Oligonucleotides primers used in real-time PCR

| Gene              | ID       | Forward primer               | Reverse primer                 |
|-------------------|----------|------------------------------|--------------------------------|
| <i>attacin-1</i>  | DQ072728 | 5'-GCAGGCGACGACAAGAAC-3'     | 5'-ATGCGTGTTGGTAAGAGTAGC-3'    |
| <i>attacin-2</i>  | AY232304 | 5'-CGTGTCGAACTTCTTAAAGCC-3'  | 5'-CCTCTTCCACAACAACC-3'        |
| <i>cecropin-6</i> | AY232302 | 5'-CCGTGTTTTATTCTTCGTCTTC-3' | 5'-AATCCTTTGACCTGCACCC-3'      |
| <i>βGRP-2</i>     | AY135522 | 5'-CTGGCGATGGCTTCTACC-3'     | 5'-CCGTGAAGTCGTGGATACC-3'      |
| <i>hemolin</i>    | M64346   | 5'-CAACCAAGCAACAACACAGG-3'   | 5'-CAGCACAGGCATCTTCTCC-3'      |
| <i>IML-2</i>      | AF242202 | 5'-ACAACACCTTCCAGCGTCTATG-3' | 5'-TTGGCGTAACCTGCTTCTTCC-3'    |
| <i>lysozyme</i>   | S71028   | 5'-GTGTGCCTCGTGGAGAATG-3'    | 5'-ATGCCTTGGTGATGTCGTC-3'      |
| <i>moricin</i>    | AY232301 | 5'-TGCTTCTTTAACCTTTGTCCTC-3' | 5'-TATTCTAACACAGCCTATAATGCG-3' |
| <i>spätzle</i>    | GQ249944 | 5'-AGTGACCAGTAAGCCAACAAC-3'  | 5'-CGAAGAGCCAAACGAGTAAATG-3'   |
| <i>rpS3</i>       | U12708   | 5'-TGCGTTTCATCATGGAGTC-3'    | 5'-TCCTTGCTGAGAAGTACG-3'       |

Table S3 Mass spectrometry identification of plasma proteins induced after *M. sexta* Spätzle-C108 injection

| <b>Band number</b> | <b>Protein name</b> | <b>Accession number</b> | <b>Predicted MW (Da)</b> | <b>Mascot Score</b> | <b>MSMS Peptides matched</b> |
|--------------------|---------------------|-------------------------|--------------------------|---------------------|------------------------------|
| 1                  | attacin-1           | gi 67906420             | 24289                    | 208                 | 3                            |
| 2                  | lysozyme            | gi 233964               | 13975                    | 346                 | 11                           |
| 3                  | cecropin B          | Contig 2488*            | 3254                     | 53                  | 1                            |
| 3                  | cecropin A          | Contig 5774*            | 2875                     | 42                  | 1                            |

\* *M. sexta* cecropin A and B sequences are partial sequences obtained from *M. sexta* ESTs available at <http://entopl.okstate.edu/profiles/7231contigs.pdf>.

Fig. S1

23 ACAACCTGACAGACGGATAGCGGGACGGTCAGCACAAATACGAACATTTAAGAACAACAGAGGTCTCTCCCGGTCTACAGCGAGACCA  
Q P D R R I A G R S A Q Y E H L R T N E R S L P V Y S E T Q

53 GAGGATACAAGCAGAAGAGAGAAGAAGACACAGTTCGAGACTAGAAGAACCAGACAACTGCTGAGAATGGTTCATATAAGATATTGAA  
R I Q A E E R R R H S S R L E E P R Q R A E N G S Y K I L N

83 TAACCTCCGAAACCTGTATTACTAATAGGAGAA**GT**AAGTGACAAATTCACACTGAAATTCATCATGATGCTGGCAAATATTTGGCGTA  
N P P K P C I T N R R

TTGGTCAAACATTTGCGGCTATTGGGCAAAGCAATATCGACTTTGTATTTTTCTAAACAGAGCTGACGTTACATCATTTCAAATAAAGCA  
AATATTCGCTCAAATACGCCAAGTATAGTGCCAGCATAAAGATCTATGCAGACGGTACTTATACGCTTTGTAAATCGCTTCGGAAGC  
ATTTAAAGGGCACAGTAAATATGATTCACCAAAAACCTCATTTTACAAAGAAAATTTGTGCGCCTGAAAAACGCGCAGAGATAATATTGA  
ATCGCGGTTTTGCATGGGTCTTGAAACATTTATAATAACTAATAAATTTATGATGCTTGGTCGCAATCTTAACGGTTCCTTCTTCTCTTT  
TGCTTCATTCTATTTCTAATATATAAAATCTAAAAACATTTAGAGCGCACTCAAACCATTCTAGGAACGCGCAGTTCATCTAATGT  
ATATAGGCCTAAAATCTTTTTTTTCTTTCAAT**AG**CACGCGAAATGACTACCTGAAACTAT**TGG**TCAAATGATTGTCGCAATGATAGG  
94 T R E I D Y P E T I G Q I D S S N D R-Spz1B  
S Q I D S S N D R-Spz1B

GTAGTGTTCCTCCCGGTCCGACTTCAGAAAAGTTCGTACGTACCCGAAGTGCCAGAGGAATGCAAGAAAATCGGCATATGCGACAGTATACCG  
113 V V F P G P T S E R S Y V P E V P E E C K K I G I C D S I P

AATTACCCAGAAGAACACGTAGCTAATATTATATCTCGA**GT**AAGTTCAATTTATTTAAACTACTTGTCTTTAGAAAGTGATATAATTG  
143 N Y P E E H V A N I I S R

ATGTTCAAATGATGCTTATTAAGGTAGATATGATTAATAATCAAGTAAGCTTTCATTGAAATCGAACAATATTTAATTATTTAAACT  
TCTTTGTATCTTATCGAATCTTATCTTTAGCGATCATTGTTAAGTTCGAATCAGAACATCAATAGTTTAATTAATAATCCTAAACGTTT  
CAAATACGATAATTTGAATAAATCAAAAACATTTCTGTTTTAATTT**AG**CTTGAGACAAAAGGAAAAGTATTACAAATAGACGAACTGG  
156 L G D K G K V L Q I D E L

ACGTATCAGACACTCCAGATATCGCCCAGAGGTTGGGTCCGCGAGGAGACAACATGGAACATATGTAGCTTTAGAGAAAAG**GT**AAATACAC  
169 D V S D T P D I A Q R L G P Q E D N M E L C S F R E K

AAAACGTTTTTTGTTTCATTTTTCCACATACATCTAGCAAGATTATTAACAGATAACTAACTCTTCTTTTACTTTTATATTTATA  
ACTTCTGTTTACAATACCTATATGGAAGAGTTAATACTTAATAATGTCAACTTCGAATCGAATTTAGATCGATGAACACTTAGAATTCG  
ACATTCGGAACCTCTTTGAATCCTTAAGGTAAAATTTTTCTGTCCAGTGTGGTTGAGGACATATTAATATTCCTCTAGTATTGAACGG  
TATGGTCAGTAAATGGTATTACCATCAGGTGACCCAAATGCTTATTTTCTCTCTTTTATATCAATAACTTTTATTTGACGTTCAATTTT  
ATCAACGTTTGAACCTATCTCTTTGTT**GCAG**ATTTTTTACCCCAAGGCAGCGCCAGACAAAGATGGAATTTGGTCTCTCGTTGTGAAT  
196 I F Y P K A A P D K D G N W F F V V N

CAAAGAAAACCCAGTACAGGTTATAAAGTTGAAATTTGCGA**GT**AAGTTTATTGTGTTAATCTATTGATAATAGAGCCCTTAGGTAGA  
215 S K E N P V Q G Y K V E I C D

GACGTACAAATCGCTCGCGTGACGGCAATATCACTACGTAGTATAATTATCTATTCAATGATATCACCAAGAATATTAACATGCAAAAAGT  
TTCAAAGTACTCAGTAACATTAACACGTGCTCGTTCTCCGGATATCAAAAACCTCTTAAACACTTGCATTAATTTCCGGTTAGATTTTACG  
ACCAGCTAGTTGCTTTATATTAATCTCCTTAGCCTTGTGTATTCCAATCTTTGAGACAATAAACCATATCGAACGTATATCATATGTT  
TAAGTAATTAAGAATTATAAAGCATTAATGACCTTCAAACGAAACATAACTATTGTTGTACTGCTGCGTGGCGAGAGAGCTACTCC  
TAAATATAGTTCGAGCCCCAAAATATCATTATTTCTTACCATCATGTCTTTACAACGTTAATGACGAATGTCCGAAATCCCTCCCG  
TCATTTGACGTCATTAATTTGTATCTAATTTGAGATCATTTGCCTGTCGTACACGAGTTTTTATTCCATTGTGAGTGGGTAATATTACTCG  
TCCTTCAAACGAGAGGGCTCTGTACCGTAGGACGTTAGCCACGCGCCAGAATGAAGATAAAATGTGACAAAACCTGATTTATTTATAAAA  
CTTCACAGAGATTTAGTACATGATCTTTAGGTATTTCTGCCATCAAGCAGGAGCTTGCATGCGTGGTTGTGTTCCGATTTGAAGAAATTA  
TATTATGCACTTTAATTAAGACTTAAAGAGACTTATTATCTTACACCAGGGCGGCTTAAGCAGTACAGTATCCAGCAATGATTTGTAA  
TTTTAAATGCTGTTGTAGTATGTGTGACGCTAGTCCGCTCACCATCAGGGGACCACCATTAACCTAGTAAACTAGATTTTTTTTTTCCA  
GCCGTGAGCAATACCATGCGCGGAGTTCGCGAGCTTCCAACAGGGATATGAAGCGAGGTGCATCCAGAAATACGTTCCGCGGACCATGT  
230 R Q Q L P C A E F A S F Q Q G Y E A R C I Q K Y V R R T M

TGGCGTTGGATCCCAAGGGTCAGATGACCGACATGCCCTTAAAGTGCCAGCTGTTGCTCATGCGGGCAAATGACAATCATATGA  
259 L A L D P K G Q M T D M P L K V P S C C S C V A K L T I I \*

Fig. S2

Dm\_Spz3 CESKIEIVTPYWASNSAGKIRAIIVNTQH----FEQAIHQEVCSN-TQTPRCEG-----ECGCEQ  
Ag\_Spz3 CESKIEIVTPYWASNSAGKIRAIIVNTQH----FEQAIHQEVCSN-TQTPRCEG-----ECGCEQ  
Aa\_Spz3 CESKIEIVTPYWASNSAGKVRAIIVNTQH----FEQAIHQEVCSK-TQTSRCSG-----DCGCEQ  
Tc\_GLEAN05940 CESKVEIVTPYWASNSAGKIRAIIVNTQH----FEQAIHQEVCAK-VRTNRCSG-----DCGCEQ  
Aa\_Spz4 CPVKKEVVAPFWANNTRGEVLALLNLNLYP----FEQYVHWEKCAVELKQMYCRE-----GCRCEQ  
Ag\_Spz4 CPVKKEVVAPFWANNTRGEVLALLNLNLYP----FEQYVHWEKCTHELKQMYCRE-----GCRCEQ  
Dm\_Spz4 CPVKDEVVAPFWANNTRGEVLALLNLNLYP----FEQYVHWEKCTHEFKQMFCDR-----GCRCEQ  
Nv\_XP001605307 CPVKKEVVAPFWANNTRGEVLALLNLNLYP----FEQYVHWEKCTNENKQMYCRD-----GCRCEQ  
Tc\_GLEAN06726 CPVKKEVVAPFWANNTRGEVLALLNMYP----FEQYVHWEKCTHEHRQMYCRD-----GCRCEQ  
Aa\_Spz2 CPSIIIRYARPQKARSATGEWKYIVNTG----EHTQTLRLEKCTTPQDSCITYLT-----DNFRSRVCVQ  
Ag\_Spz2 CPSIIIRYARPQKARSATGEWKYIVNTG----EHTQTLRLEKCTTPQDSCITYLT-----DNFRSRVCVQ  
Dm\_Spz2 CQSVVRYARPQKAKSASGEWKYIVNTG----QHTQTLRLEKCSNPVESCYSYLA-----QTYRSHCSQ  
Nv\_XP001607462 CPSLVQYARPQLARAASGVWKYIINTG----EHTQTLRLEKCTPRTSCTSFI-----ENYKSSCMQ  
Ms\_Spz CSFREKIFYPKAAPDKDGNWFFVNSKE---NPVQGYKVEICDRQQLPCAFAFAS---FQQGYEARCIQ  
Bm\_Spz CDFRVQIMTPLAAQSDDLKWHVHLNFNE---NPLQGFVREICNTTSTGCAKFVT---MENNYPKCVQ  
Tc\_GLEAN01054 CTSISKTIFFRVGINKNNKWKVIINQEED--GYIQGIRTEICRKN-----GYITSCCKQ  
Nv\_XP001606369 CEATEKVVYPKVAQSKDKEWLFVWNQE---GFSQGVVRETCGKKNACNLIEG---FAEGYKTVCKQ  
Dm\_Spz1A CRSIRKLVYPKKGLRADDTWQLIVNND----EYKQAIQIECEGADQPCDFAAN---FPQSYNPICKQ  
Aa\_Spz1A CESRERLIHPRSGFNNTDNRITIMIINTK----EYMQGVRIETCSSQGQPCVKLN-----PLFGKTECRQ  
Aa\_Spz5 CQSTREMYVTPQAALNTKGNWMIIVNHEE---SRQLVKAEIC--TSSECSNLCS----LPGYNSRCEQ  
Ag\_Spz5 CSVREYIITPQALNTKGNWMIIVNHEE---SRQLVKAEIC--ASTECSNLCS----FPIGYSSRCEQ  
Dm\_Spz5 CQTRSQFITPQAALNSRGNWMIIVNHEE---ARQMVKAELC--ASNTCSNLCE----LPGYNSRCEQ  
Tc\_GLEAN13304 CTSRSQYIMPRAALNNKGNWMIIVNHEE---ARQMVKAELC--ASQTC SGLCG----LPGYTSRCEQ  
Nv\_XP001606369 CPTRSQFVTPKAALNNQGNWMIIVNLEQ--NKHSQLVKSE---VSKHATGLCS----LPLGYTSKCCQ  
Aa\_Spz6 CPAKVEYATPVFAKNYQGSWRVYVQIPYEG-YFTQTVEVTRC--LQARCHYLDG-----GCCD  
Ag\_Spz6 CPAKVEYATPVFAKNYQGSWRVYVQIPYEG-YFTQTVEVTRC--LQARCHYLDAPTAASSAKANQHCD  
Dm\_Spz6 CPAKVEYATPVFAKNYQGAWRVYVQIPYEG-YFTQTVEVTRC--IQARCHYLDG-----GCCD  
Tc\_GLEAN16368 CPAKVEYATPVFAKNYQGVWRVYVQIPYEG-YFTQTVEVTRC--LQSRCHYLDG-----GCCD  
\* \* ::: \*

Dm\_Spz3 KYKWHRLLAYDPDNDCKGIFMDWFLFPSCCV  
Ag\_Spz3 KYKWHRLLAYDPDNDCKGIFMDWFLFPSCCV  
Aa\_Spz3 KYKWHRLLAYDPDNDCKGIFMDWFLFPSCCV  
Tc\_GLEAN05940 KYKWHRLLAYDPDNDCKGIFMDWFLFPSCCV  
Aa\_Spz4 QYRLHRLLAYDPHNECRGIFSDWFRFPSCCIC  
Ag\_Spz4 QYRLHRLLAYDPHNECRGIFSDWFRFPSCCIC  
Dm\_Spz4 QYRLHRLLAYDPHNECRGIFSDWFRFPSCCIC  
Nv\_XP001605307 QYRLHRLLAYDPNNECRGIFSDWFKFPSCCIC  
Tc\_GLEAN06726 QYRLHRLLAYDPNNECRGIFSDWFRFPSCCV  
Aa\_Spz2 IYNYHRLLSWDTARG---LHVDIFKVPTCCSC  
Ag\_Spz2 IYNYHRLLSWDTARG---LHVDIFKVPTCCSC  
Dm\_Spz2 VYNYHRLLSWDKVRG---LHVDIFKVPTCCSC  
Nv\_XP001607462 VYNYHRLLTWDSKLG---LHMDIFKVPTCCSC  
Ms\_Spz KYVVRTMLALDPKGQ---MTDMLKVPSCCSC  
Bm\_Spz KFI FRKMKILSESGE---MIERSMKVPSCCSC  
Tc\_GLEAN01054 KYMLRRMMSLSENGD---PVPDTFQLPSACCC  
Nv\_XP001606369 KYIYRQLVALSTIGQ---LKPEKFRFPASCCC  
Dm\_Spz1A HYTQQTLASIKSDGEL-DVVQNSFKIPSCCKC  
Aa\_Spz1A LYHYRTLALIDPQTN--QPYKEKFKLPSCKC  
Aa\_Spz5 KFSQKRLLTLEADGQ--SLYVDTYWFPSCCV  
Ag\_Spz5 RYVQKRLVTLDPGR--TLYVDTYWFPSCCV  
Dm\_Spz5 KFVQKRLIALQGNQ--NLYTDTFVFPSCCV  
Tc\_GLEAN13304 KYVQKRLVALEGAGN--ELYTDVFWFPSCCV  
Nv\_XP001606369 QYVQKRLVALESGN--RLYTDVFWFPHGCMC  
Aa\_Spz6 GHDEIGCFQVR-----LYYDWFIPGSCKC  
Ag\_Spz6 GHDEIGCFQVR-----LYYDWFIPGSCKC  
Dm\_Spz6 GHDEIGCFQVR-----LYYDWFIPGSCKC  
Tc\_GLEAN16368 GVDALGCFQVR-----LYYDWFIPGSCKC  
\* \* \*

Fig. S3

A

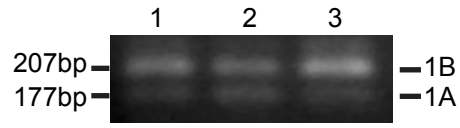

B

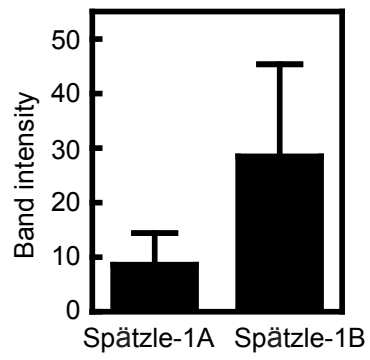

Supplement: NIHMS159141-supplement-supplementary_data.pdf [file NIHMS159141-supplement-supplementary_data.pdf]
